# Supplementary material for: Adipose-mesenchymal stromal cells suppress experimental Sjögren syndrome by IL-33-driven expansion of ST2+ regulatory T cells
Source: PubMed Central journal article supplement — iScience. 2021 Apr 16;24(5):102446. doi: 10.1016/j.isci.2021.102446 (PMC8105666; doi:10.1016/j.isci.2021.102446), 2021-04-16
Supplement: mmc1.pdf [file mmc1.pdf]

**Supplemental information**

**Adipose-mesenchymal stromal cells suppress  
experimental Sjögren syndrome by IL-33-driven  
expansion of ST2<sup>+</sup> regulatory T cells**

**Ousheng Liu, Junji Xu, Fu Wang, Wenwen Jin, Peter Zanvit, Dandan Wang, Nathan Goldberg, Alexander Cain, Nancy Guo, Yichen Han, Andrew Bynum, Guowu Ma, Songlin Wang, Zhangui Tang, and Wanjun Chen**

**A**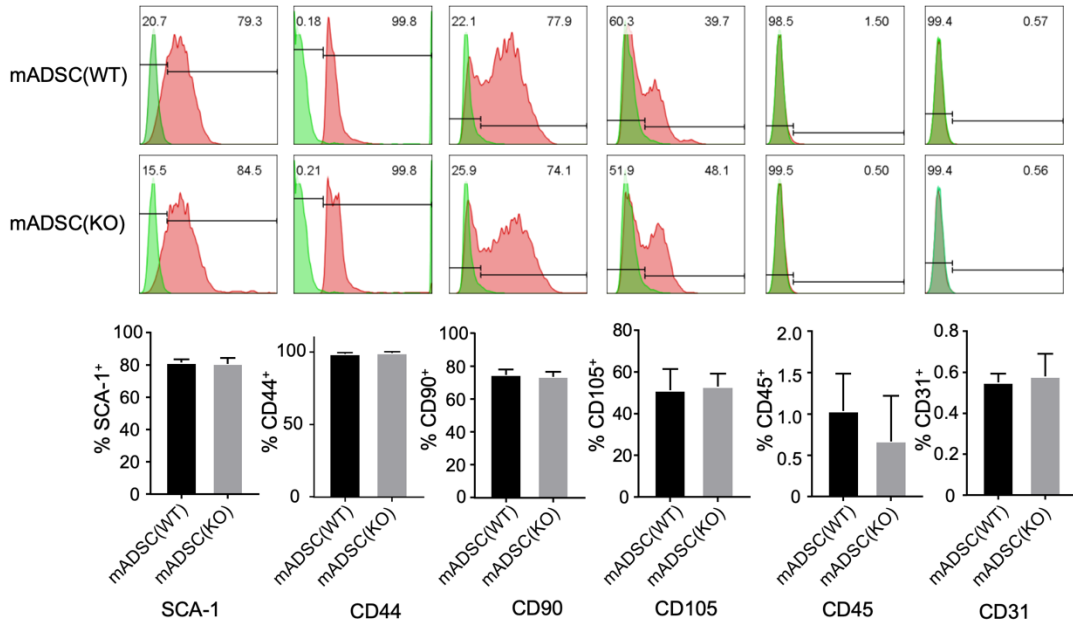**B**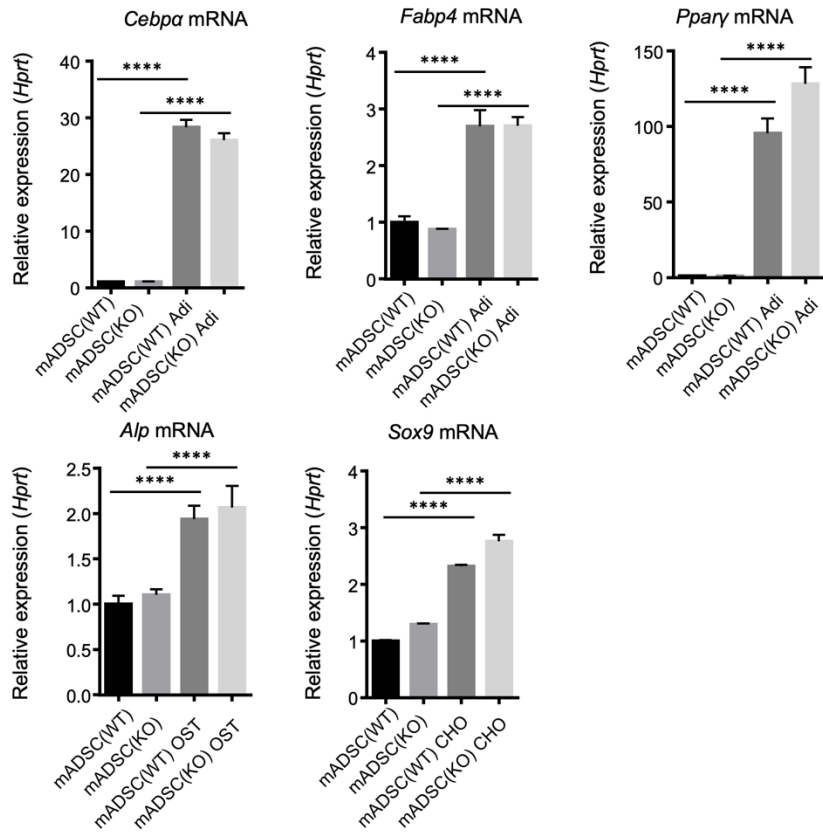

**Figure S1. Characterization of the immunophenotype and differentiation potential of mADSC from C57BL/6 or C57BL/6J-*I33<sup>tm1b(EUCOMM)Cln</sup>* *in vitro*. Related to Figure 1.**

(A) mADSCs from C57BL/6 or C57BL/6J-*I33<sup>tm1b(EUCOMM)Cln</sup>* express MSC markers.

(B) mADSCs from C57BL/6 or C57BL/6J-*I33<sup>tm1b(EUCOMM)Cln</sup>* were capable of differentiating into adipocytes, osteoblasts, and chondroblast under inductive culture conditions.

Data are pooled from three (A,B) independent experiments. One-way ANOVA was used. Bars, mean; error bars, SEM; \*\*\*\* $P < 0.0001$ .

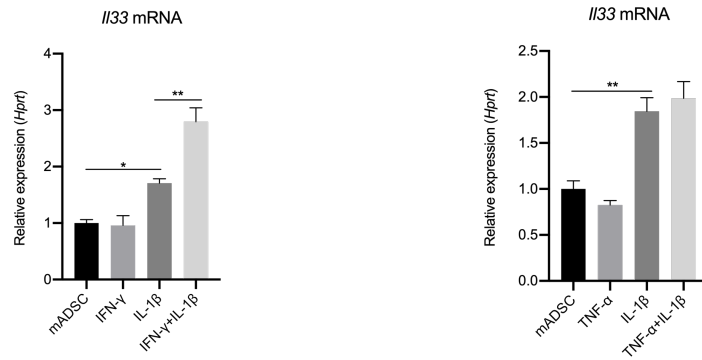

**Figure S2. Expression pattern of IL-33 induced by IL-1 $\beta$  synergistically work with TNF- $\alpha$  and IFN- $\gamma$ . Related Figure 2.**

IL33 mRNA expression in mADSC stimulated with indicated combinations of recombinant cytokines (10 ng/ml each) for 6 hr.

Data are pooled from three independent experiments. One-way ANOVA was used. Bars, mean; error bars, SEM; \* $P < 0.05$ , \*\* $P < 0.01$ .

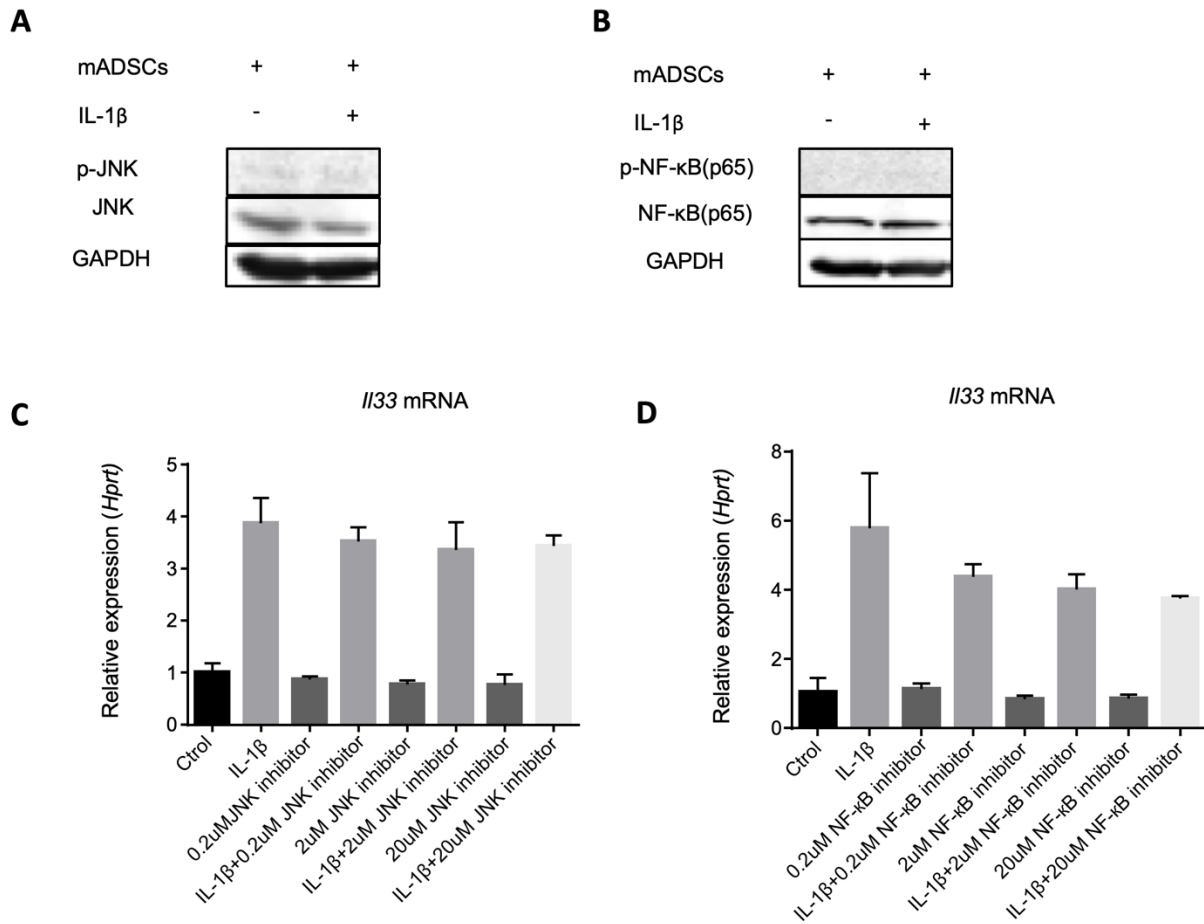

**Figure S3. IL-1 $\beta$  upregulates IL-33 expression in mADSC independent on JNK and NF- $\kappa$ B(p65) pathways. Related to Figure 2.**

(A) Western blot of p-JNK, JNK, and GAPDH in mADSC stimulated with or without 2ng/ml IL-1 $\beta$  for 2 hr.

(B) Western blot of p-NF- $\kappa$ B(p65), NF- $\kappa$ B(p65) and GAPDH in mADSC stimulated with or without IL-1 $\beta$  for 2 hr.

(C) *IL33* mRNA expression in mADSC stimulated for 6 hr with or without 2ng/ml IL-1 $\beta$  plus indicated the concentration of SP600125.

(D) *IL33* mRNA expression in mADSC stimulated for 6 hr with or without 2ng/ml IL-1 $\beta$  plus indicated the concentration of JSH23.

Data are pooled from three (C and D) independent experiments or are representative of three (A and B) independent experiments. In (C and D), one-way ANOVA was used. Bars, mean; error bars, SEM.

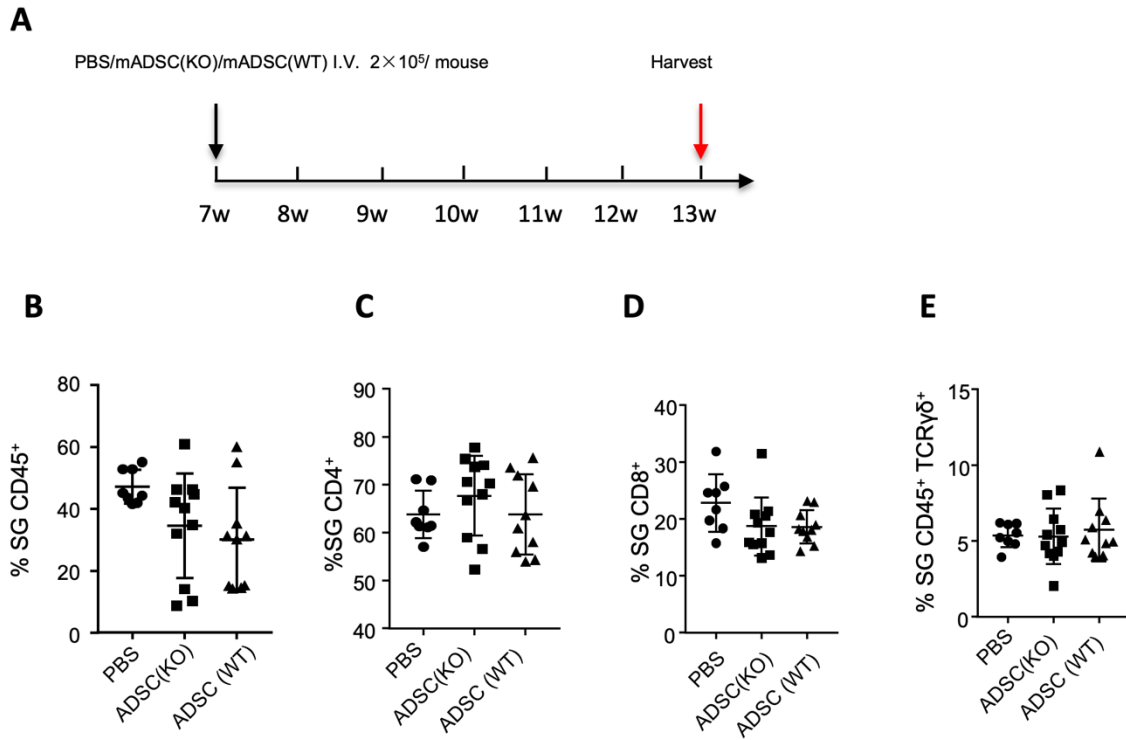

**Figure S4. CD45<sup>+</sup> immune cells express in the submandibular glands of NOD/Ltj mice injected with PBS, ADSC from WT or *I133*<sup>-/-</sup> mice. Related to Figure 4.**

(A) Experimental workflow of allogeneic mADSCs from WT or *I133*<sup>-/-</sup> mice, or PBS infused to NOD/Ltj mice at 7 weeks of age.

(B) Frequency of CD45<sup>+</sup> cells in the submandibular glands of NOD/Ltj mice injected with PBS, ADSC from WT or *I133*<sup>-/-</sup> mice.

(C) Frequency of CD45<sup>+</sup>TCRβ<sup>+</sup>CD4<sup>+</sup> cells in the submandibular glands of NOD/Ltj mice injected with PBS, ADSC from WT or *I133*<sup>-/-</sup> mice.

(D) Frequency of CD45<sup>+</sup> TCRβ<sup>+</sup>CD8<sup>+</sup> cells in the submandibular glands of NOD/Ltj mice injected with PBS, ADSC from WT or *I133*<sup>-/-</sup> mice.

(E) Frequency of CD45<sup>+</sup> TCRγδ<sup>+</sup> cells in the submandibular glands of NOD/Ltj mice injected with PBS, ADSC from WT or *I133*<sup>-/-</sup> mice. Data are pooled from three independent experiments. One-way ANOVA was used. Bars, mean; error bars, SEM.

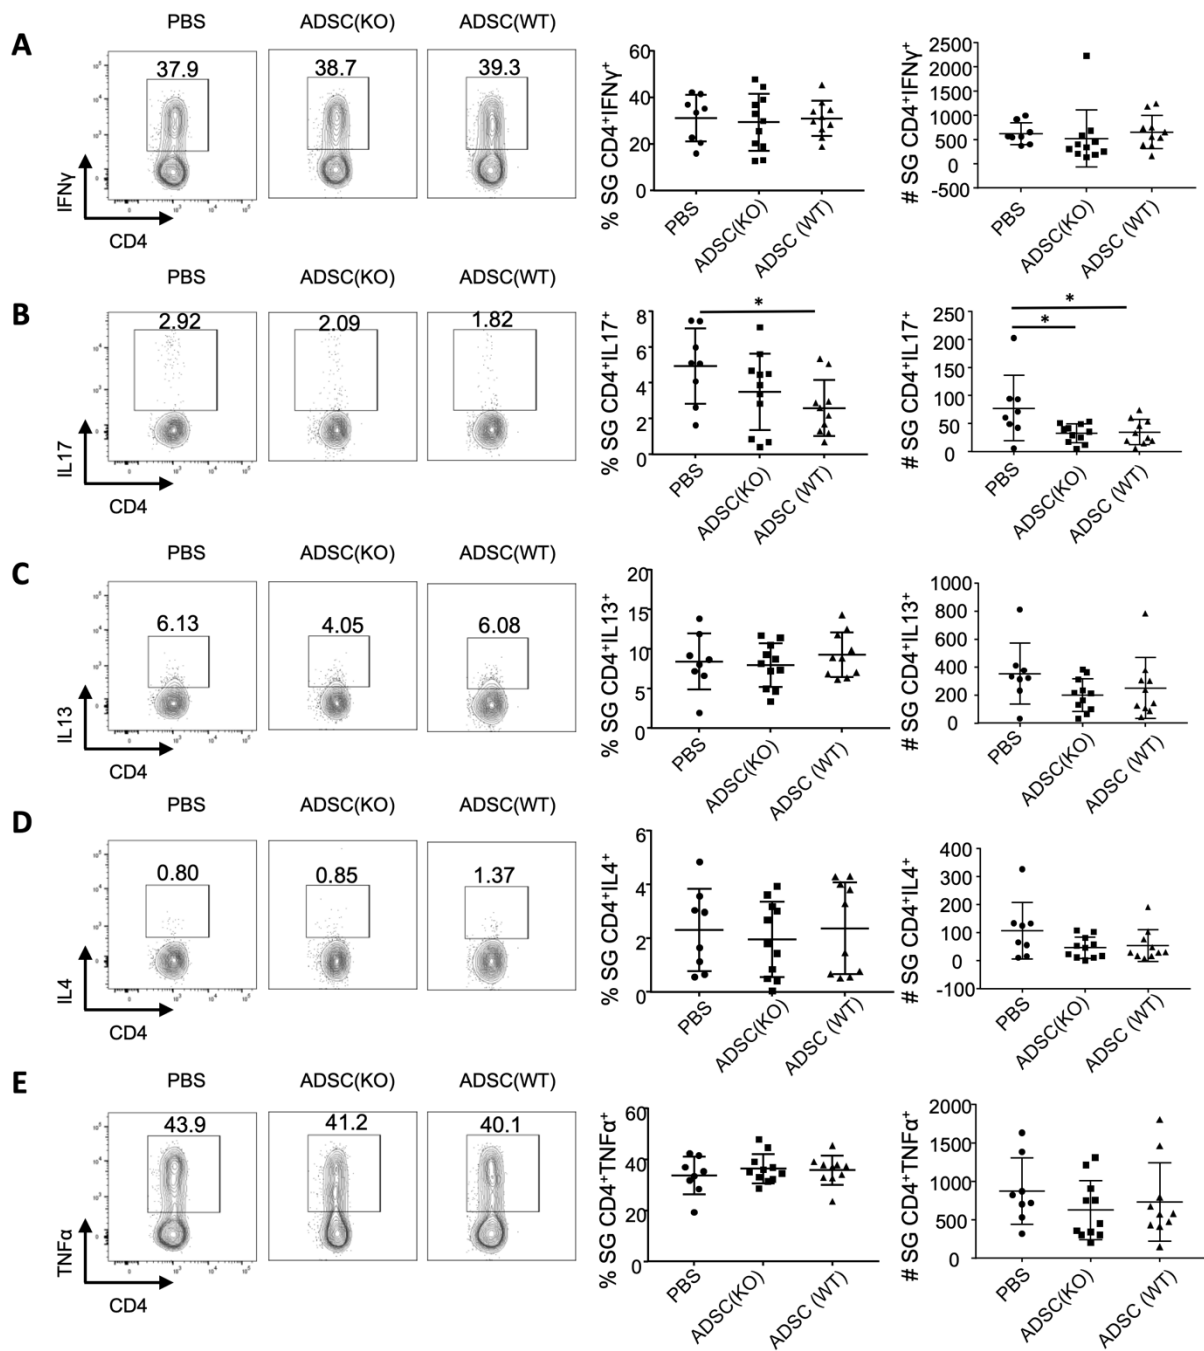

**Figure S5. Cytokine expression in TCR $\beta$ <sup>+</sup>CD4<sup>+</sup> cells in the submandibular glands of NOD/Ltj mice injected with ADSCs from WT or *I33*<sup>-/-</sup> mice. Related to Figure 5.**

(A) Frequency and absolute numbers of IFN $\gamma$ <sup>+</sup> in TCR $\beta$ <sup>+</sup>CD4<sup>+</sup> cells in the submandibular glands of NOD/Ltj mice injected with PBS, ADSC from WT or *I33*<sup>-/-</sup> mice.

(B) Frequency and absolute numbers of IL-17<sup>+</sup> in TCR $\beta$ <sup>+</sup>CD4<sup>+</sup> cells in the submandibular glands of NOD/Ltj mice injected with PBS, ADSC from WT or *I33*<sup>-/-</sup> mice.

(C) Frequency and absolute numbers of IL-13<sup>+</sup> in TCR $\beta$ <sup>+</sup>CD4<sup>+</sup> cells in the submandibular glands of NOD/Ltj mice injected with PBS, ADSC from WT or *I33*<sup>-/-</sup> mice.

(D) Frequency and absolute numbers of IL-4<sup>+</sup> in TCR $\beta$ <sup>+</sup>CD4<sup>+</sup> cells in the submandibular glands of NOD/Ltj mice injected with PBS, ADSC from WT or *I33*<sup>-/-</sup> mice.

(E) Frequency and absolute numbers of TNF- $\alpha$ <sup>+</sup> in TCR $\beta$ <sup>+</sup>CD4<sup>+</sup> cells in the submandibular glands of NOD/Ltj mice injected with PBS, ADSC from WT or *I33*<sup>-/-</sup> mice.

Data are pooled from three independent experiments. One-way ANOVA was used. Bars, mean; error bars, SEM; \**P* < 0.05.



**A**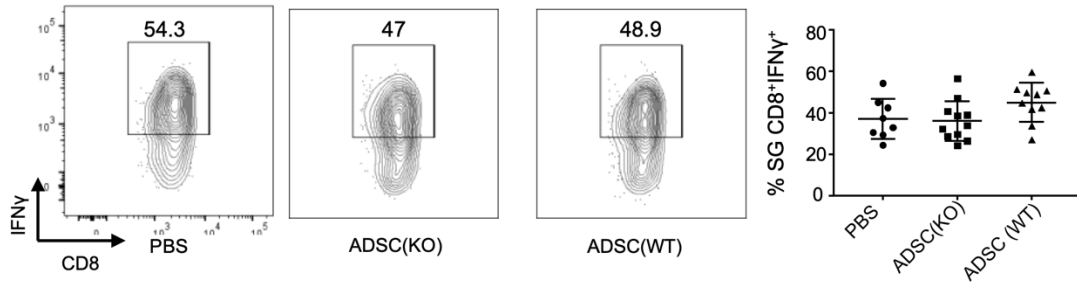**B**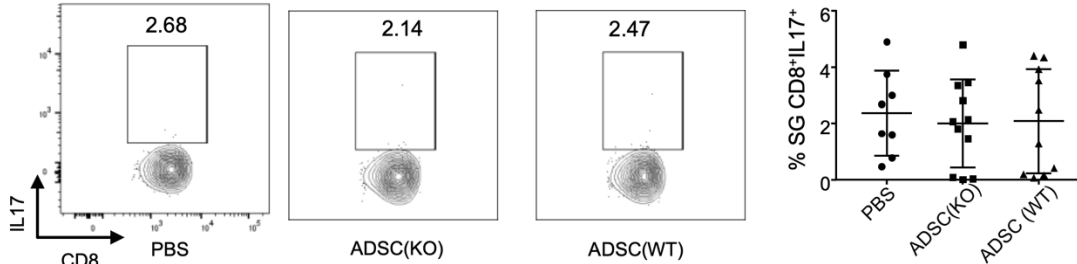**C**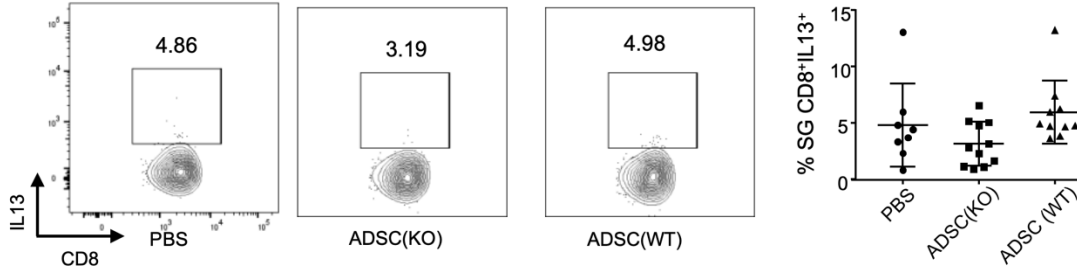**D**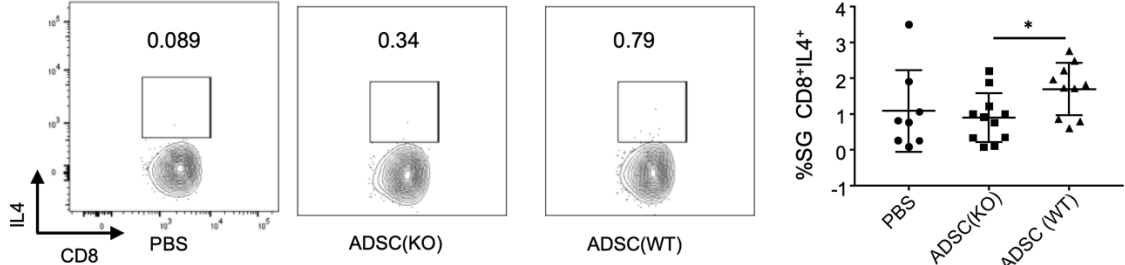**E**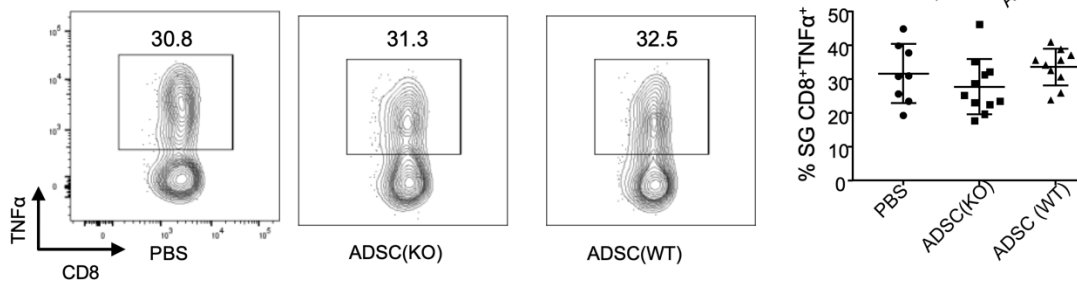

**Figure S6. Cytokine expression in TCR $\beta$ <sup>+</sup>CD8<sup>+</sup> cells in the submandibular glands of NOD/Ltj mice treated with ADSCs from WT or *I133*<sup>-/-</sup> mice. Related to Figure 5.**

(A) Frequency of IFN $\gamma$ <sup>+</sup> in TCR $\beta$ <sup>+</sup>CD8<sup>+</sup> cells in the submandibular glands of NOD/Ltj mice injected with PBS, ADSC from WT or *I133*<sup>-/-</sup> mice.

(B) Frequency of IL17<sup>+</sup> in TCR $\beta$ <sup>+</sup>CD8<sup>+</sup> cells in the submandibular glands of NOD/Ltj mice injected with PBS, ADSC from WT or *I133*<sup>-/-</sup> mice.

(C) Frequency of IL13<sup>+</sup> in TCR $\beta$ <sup>+</sup>CD8<sup>+</sup> cells in the submandibular glands of NOD/Ltj mice injected with PBS, ADSC from WT or *I133*<sup>-/-</sup> mice.

(D) Frequency of IL4<sup>+</sup> in TCR $\beta$ <sup>+</sup>CD8<sup>+</sup> cells in the submandibular glands of NOD/Ltj mice injected with PBS, ADSC from WT or *I133*<sup>-/-</sup> mice.

(E) Frequency TNF $\alpha$ <sup>+</sup> in TCR $\beta$ <sup>+</sup>CD8<sup>+</sup> cells in the submandibular glands of NOD/Ltj mice injected with PBS, ADSC from WT or *I133*<sup>-/-</sup> mice.

Data are pooled from three independent experiments. One-way ANOVA was used. Bars, mean; error bars, SEM; \**P* < 0.05.

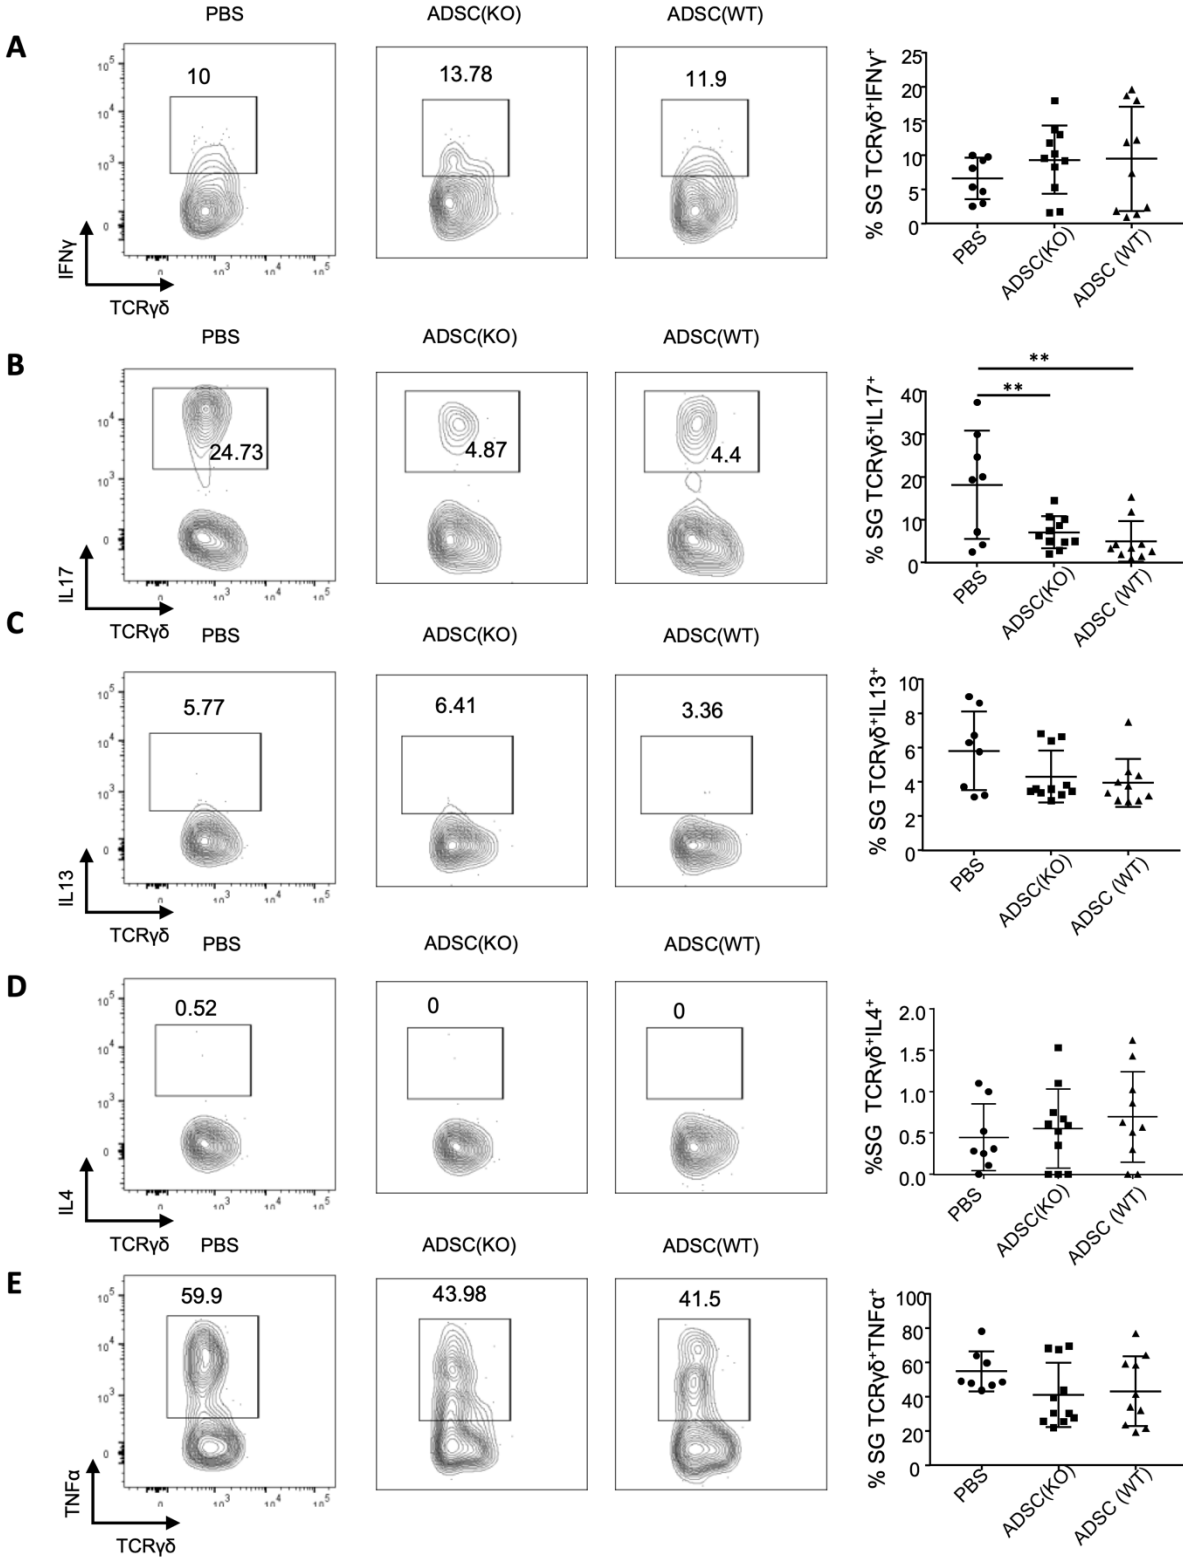

**Figure S7. Cytokine expression in TCR $\gamma\delta^+$  cells in the submandibular glands of NOD/Ltj mice treated with ADSCs from WT or *I133<sup>-/-</sup>* mice. Related to Figure 5.**

(A) Frequency of IFN $\gamma^+$  in TCR $\gamma\delta^+$  cells in the submandibular glands of NOD/Ltj mice injected with PBS, ADSC from WT or *I133<sup>-/-</sup>* mice.

(B) Frequency of IL17 $^+$  in TCR $\gamma\delta^+$  cells in the submandibular glands of NOD/Ltj mice injected with PBS, ADSC from WT or *I133<sup>-/-</sup>* mice.

(C) Frequency of IL13 $^+$  in TCR $\gamma\delta^+$  cells in the submandibular glands of NOD/Ltj mice injected with PBS, ADSC from WT or *I133<sup>-/-</sup>* mice.

(D) Frequency of IL4 $^+$  in TCR $\gamma\delta^+$  cells in the submandibular glands of NOD/Ltj mice injected with PBS, ADSC from WT or *I133<sup>-/-</sup>* mice.

(E) Frequency of TNF $\alpha^+$  in TCR $\gamma\delta^+$  cells in the submandibular glands of NOD/Ltj mice injected with PBS, ADSC from WT or *I133<sup>-/-</sup>* mice. Data are pooled from three independent experiments. One-way ANOVA was used. Bars, mean; error bars, SEM; \*\* $P < 0.01$ .

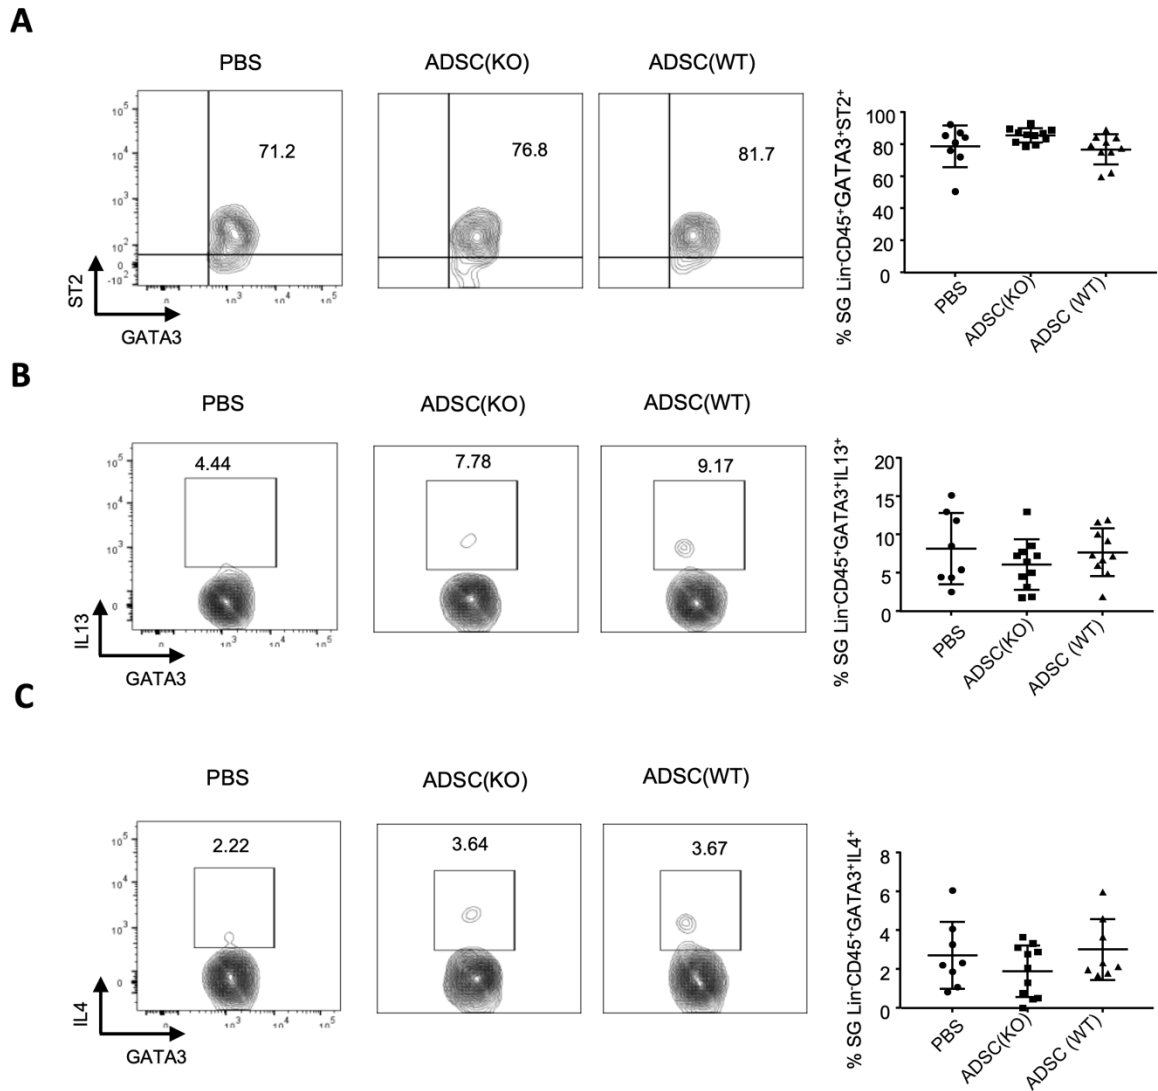

**Figure S8. ST2, IL-13, and IL-4 express in ILC2 in the submandibular glands of NOD/Ltj mice injected with ADSCs from WT or *Il33*<sup>-/-</sup> mice. Related to Figure 5.**

(A) The frequency of ST2<sup>+</sup> in ILC2 in the submandibular glands of NOD/Ltj mice injected with PBS, ADSC from WT or *Il33*<sup>-/-</sup> mice.

(B) The frequency of IL-13<sup>+</sup> in ILC2 in the submandibular glands of NOD/Ltj mice injected with PBS, ADSC from WT or *Il33*<sup>-/-</sup> mice.

(C) The frequency of IL-4<sup>+</sup> in ILC2 in the submandibular glands of NOD/Ltj mice injected with PBS, ADSC from WT or *Il33*<sup>-/-</sup> mice.

Data are pooled from three independent experiments. One-way ANOVA was used. Bars, mean; error bars, SEM.

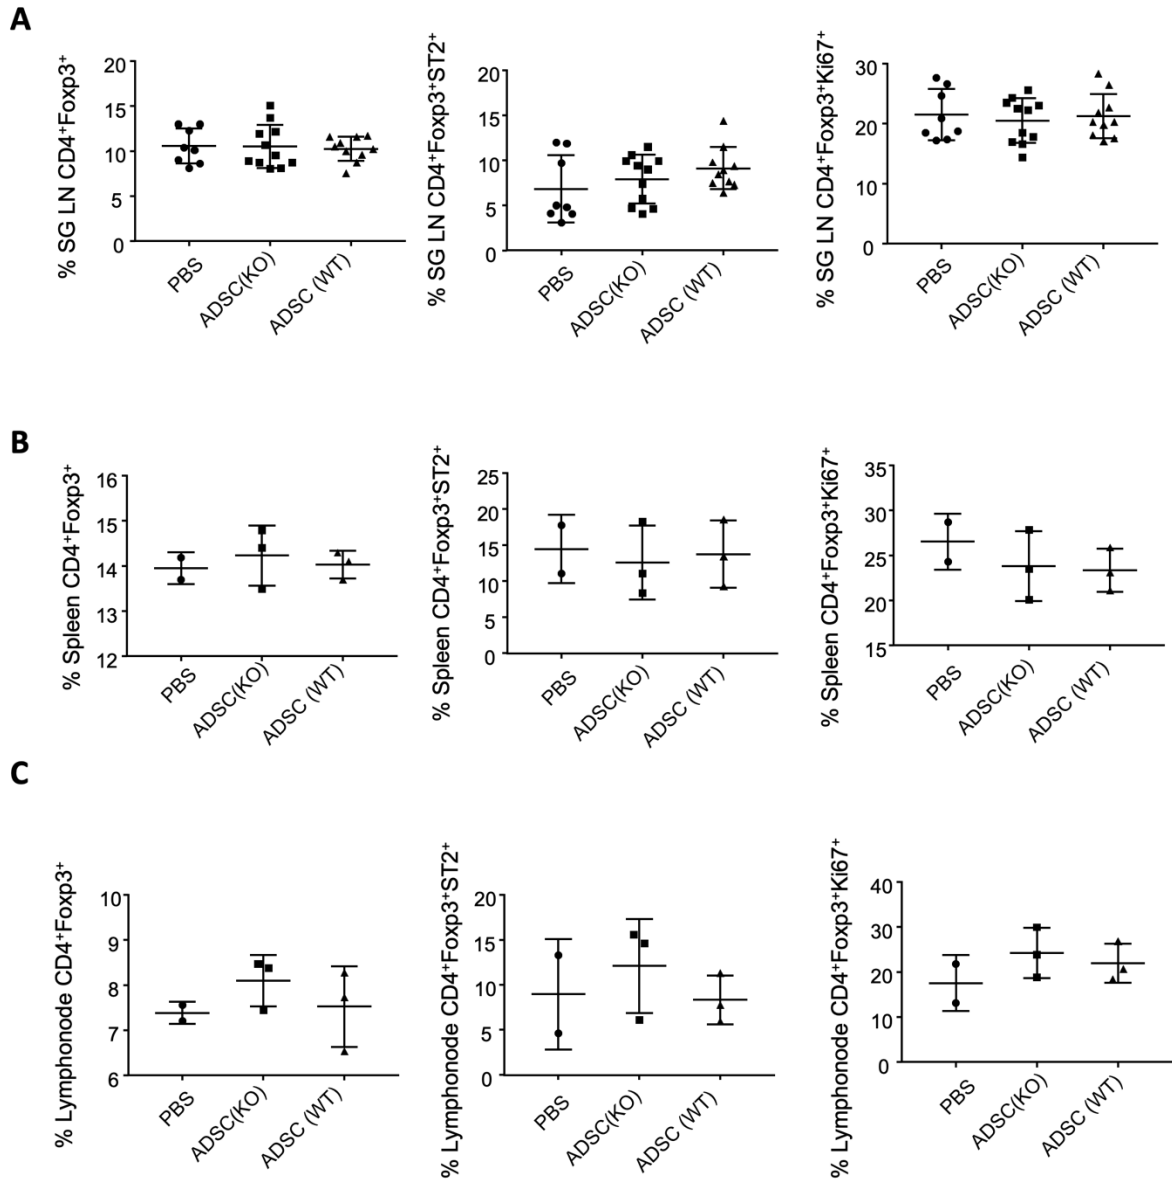

**Figure S9. Tregs in the Spleen and lymph nodes of NOD/Ltj mice treated with ADSCs from WT or *Il33*<sup>-/-</sup> mice. Related to Figure 5.**

(A) Frequency of CD4<sup>+</sup>Foxp3<sup>+</sup> T, ST2 in Treg and Ki67 in Treg cells in the submandibular lymph node of NOD/Ltj mice injected with PBS, ADSC from WT or *Il33*<sup>-/-</sup> mice.

(B) Frequency of CD4<sup>+</sup>Foxp3<sup>+</sup> T, ST2 in Treg and Ki67 in Treg cells in the spleen of NOD/Ltj mice injected with PBS, ADSC from WT or *Il33*<sup>-/-</sup> mice.

(C) Frequency of CD4<sup>+</sup>Foxp3<sup>+</sup> T, ST2 in Treg and Ki67 in Treg cells in the armpit and inguinal lymph nodes of NOD/Ltj mice injected with PBS, ADSC from WT or *Il33*<sup>-/-</sup> mice.

Data (A) are pooled from three independent experiments. Data (B and C) are pooled from two independent experiments. One-way ANOVA was used. Bars, mean; error bars, SEM.

## Transparent Methods

### Mice

Male mice *C57BL/6*, Female NOD/ShiLtj mice (*Cdh23ahl*) mice were purchased from The Jackson Laboratory. Male mice *C57BL/6J-Il33<sup>tm1b(EUCOMM)Cln</sup>* were donated by Washington University at St. Louis. All animal studies were approved by the Animal Care and Use Committees of National Institute of Dental and Craniofacial Research, National Institutes of Health. 6 to 10 weeks old mice were used for all experiments.

### Mice/human ADSCs culture

ADSCs were prepared from *C57BL/6* or *C57BL/6J-Il33<sup>tm1b(EUCOMM)Cln</sup>* subcutaneous fat as described previously<sup>(1)</sup> and cultured for 2 weeks. Human ADSCs were purchased from Lonza Walkersville Inc, which were isolated from healthy (non-diabetic) adult lipoaspirates collected during elective surgical liposuction procedures. Mice and human ADSCs were cultured in alpha-minimum essential medium containing 20% fetal calf serum and 1% antibiotic-antimycotic (Gibco) in a 5%CO<sub>2</sub> incubator at 37°C. In brief, tissue was minced with two scalpels (crossed blades) and then incubated in a 0.5% collagenase I/phosphate buffered saline (PBS) solution (Collagenase Type: CLS, Biochrom, Berlin, Germany; PBS, Sigma, Taufkirchen, Germany) for 40min at 37°C under constant shaking. The digested tissue solution was then separated through a 100 µm strainer, and the resulting filtrate was centrifuged at 300 g for 5 min. The resulting pellet was washed twice with medium and centrifuged again at 300 g for 5 min. Finally, cells were plated for initial cell culture and cultured at 37°C in an atmosphere of 5% CO<sub>2</sub> in the humid air. alpha-minimum essential medium (α-MEM, Gibco) with a physiologic glucose concentration (100 mg/dL) and used as a standard culture medium. The medium was replaced every three days. Subconfluent cells (90%) were passaged by trypsinization. Cells between passages 2 and 3 were used throughout the experiments. Cell morphology was examined by phase contrast microscopy.

### CD4<sup>+</sup>CD25<sup>+</sup>Treg isolation and culture

CD4<sup>+</sup>CD25<sup>+</sup>Tregs from spleen and lymph node from *C57BL/6* mice were purified by magnetic cell sorting (Miltenyi Biotec). Tregs were cultured in completed DMEM with or without ADSCs lysates.

### ADSCs lysates preparation

ADSCs from WT or *Il33<sup>-/-</sup>* mice were cultured with IL-1β for 72h. Then ADSCs were broken with ultrasonic method (output power 500W, twice, 5min/each, 4°C) and centrifuged at 14000rpm for 20min. Then the supernatant was collected. CD4<sup>+</sup>CD25<sup>+</sup>Tregs were cultured with IL-1β-stimulated WT or *Il33<sup>-/-</sup>* ADSC lysates for 24h and 72h with indicated concentration of plate-bound 1µg/ml anti-CD3, 1µg/ml soluble anti-CD28 and 100U/ml IL-2 for 3 days. *Il1r1* mRNA in Tregs and ST2<sup>+</sup>Treg were detected by real-time PCR and flow cytometry analysis.

### Real-time PCR

Total RNA was derived from cells using RNeasy Mini Kit (QIAGEN) and reversed transcribed using High Capacity cDNA Reverse Transcription Kit (Applied Biosystems). Quantitative real-time PCR was performed according to the protocol of TaqMan Gene Expression Master Mix (Applied Biosystems) with the following TaqMan primers: Hprt, Mm00446968\_m1; MmIl33, Mm00505403\_m1; MmSt2, Mm00516117\_m1; MmCebpa, Mm00514283\_s1; MmFabp4, Mm00445878\_m1; MmPpar, Mm01184322\_m1; MmAlp, Mm00475834\_m1; MmSox9, Mm00448840\_m1; MmGapdh, Mm99999915\_g1; MmFoxp3, Mm00475162\_m1; Human Gapdh Hs02758991\_m1; Human Il33, Hs04931857\_m1.

### Western blot analysis

Protein was extracted using RIPA buffer containing proteinase inhibitor cocktail and quantified with a Bio-Rad protein assay. An equal amount of protein was separated on SDS-polyacrylamide gels in a Tris/SDS buffer system and then transferred onto nitrocellulose membranes. Blotting was performed according to standard procedures with primary antibodies against IL-33, ERK, p38, JNK, NF-κB(p65), p-ERK, p-p38, p-JNK, p-NF-κB (p65), β-actin and GAPDH overnight, followed by incubation with appropriate fluorescence-conjugated secondary antibodies. The proteins of interest were analyzed using an Odyssey IR scanner, and signal intensities were quantified using NIH Image/J software.

## ELISA assays

To evaluate protein levels of IL-33 in cell lysates and cell culture supernatants, ELISA assays were performed by ELISA kits from R&D Systems according to the manufacturer's instruction.

## Flow cytometry analysis

For intracellular cytokine staining, cells were stimulated with PMA (50 ng/ml), Ionomycin (250 ng/ml) and Golgi-Plug (1:1000 dilution, BD PharMingen) at 37°C for 4h, followed by fixation with the Fixation/Permeabilization buffer solution (BD Biosciences) according to manufacturer's instruction. The staining procedures for MOG38-49-specific tetramer were previously described<sup>(2)</sup>. Stained cells were analyzed on an LSRFortessa (BD Biosciences), and data were analyzed with FlowJo software.

## Allogeneic ADSCs treatment and saliva flow rate measurement

Allogeneic ADSCs from mice *C57BL/6J* or *C57BL/6J-II33<sup>tm1b(EUCOMM)Cln</sup>* treatment and saliva flow rate measurement, For ADSCs treatment, NOD/ShiLtj mice were injected with 1\*10<sup>5</sup> ADSCs (from *C57BL/6* or *C57BL/6J-II33<sup>tm1b(EUCOMM)Cln</sup>*) in 0.10 ml PBS via the tail vein. Mice were injected with isoproterenol/pilocarpine to stimulate saliva secretion. For saliva flow rate test, mice were weighed, and mild anesthesia was induced with a solution of Ketamine and Xylazine (20 mg/ml; Sigma) in sterile water, given intraperitoneally (1 µl/g of body weight). Salivary secretion was stimulated using 0.1 ml/kg body weight of a pilocarpine solution (50 mg/ml) subcutaneously. Saliva collection began within two minutes of pilocarpine administration. Animals were positioned with a 75-mm hematocrit tube placed in the oral cavity, and the whole saliva was collected into pre-weighed 0.75 ml Eppendorf tubes for 10 minutes. The amount of saliva collected was determined gravimetrically.

## Histology

Salivary glands were collected and fixed in 10% formalin (Richard-Allan Scientific), embedded in paraffin, cut longitudinally into 5-mm sections and stained with hematoxylin and eosin. Images were acquired using Aperio digital pathology system and processed in Aperio ImageScope v11.1.2.752 software and the area of inflammatory focus (containing >50 lymphocytes per 4mm<sup>2</sup> tissue) was calculated per field at X200 magnification by Image-Pro Plus Version 6.0 software (Media Cybernetics). Five entire salivary gland sections for each animal were counted with an average of 10 fields by an expert of histopathology under blinded fashion.

## Statistics

All data have a normal distribution and are presented as mean ± standard error of the mean (SEM; in data of infiltrating area statistics) or standard deviation (in other data) of three independent experiments, and we used an  $\alpha$  level of 0.05 for all statistical tests. The mice salivary flow rates were statistically analyzed with repeated measurement; other data were analyzed with student's t-test, one-way analysis of variance (ANOVA), or two-way ANOVA. All *P* value less than 0.05 were considerate significant. Statistical analysis was done with Graphpad Prism 7.

## Reagent or Resource source identifier

Antibodies Purified anti-mouse CD3 (145-2C11) Bio X Cell Cat# BE0001-1; RRID: AB\_1107634  
Purified anti-mouse CD28 (37.51) Bio X Cell Cat# BE0015-1; RRID: AB\_1107624  
Anti-mouse CD4 Alexa Fluor 405(RM4-5) eBioscience Cat# MCD0426; RRID: AB\_1473885  
Anti-mouse CD4 Alexa Fluor 700 (RM4-5) eBioscience Cat# 56-0042-82; RRID: AB\_494000  
Anti-mouse CD4 PerCP-Cy5.5 (RM4-5) eBioscience Cat# 45-0042-82; RRID: AB\_1107001  
Anti-mouse CD4 PE-Cy7 (RM4-5) eBioscience Cat# 25-0042-82; RRID: AB\_469578  
Anti-mouse CD8a PerCP-Cy5.5 (53-6.7) eBioscience Cat# 45-0081-82; RRID: AB\_1107004  
Anti-mouse CD8b FITC (eBioH35-17.2 (H35-17.2)) eBioscience Cat# 11-0083-82; RRID: AB\_657764  
Anti-mouse CD62L PE (MEL-14) eBioscience Cat# 12-0621-82; RRID: AB\_465721  
Anti-mouse CD44 APC (IM7) eBioscience Cat# 17-0441-82; RRID: AB\_469390  
Anti-mouse CD45 Alexa Fluor 700 (30-F11) eBioscience Cat# 56-0451-82; RRID: AB\_891454  
Anti-mouse CD45 Pacific Blue (30-F11) eBioscience Cat# MCD4528; RRID: AB\_1500474  
Anti-mouse CD25 PE (PC61.5) eBioscience Cat# 12-0251-82; RRID: AB\_465607  
Anti-mouse TCR $\beta$  APC-Cy7(H57-597) eBioscience Cat# 47-5961-82; RRID: AB\_1272173  
Anti-mouse TCR $\gamma\delta$  Percp-eFlour710 (eBioGL3 (GL-3, GL3)) Cat# 46-5711-82; RRID: AB\_2016707



Anti-mouse/rat Foxp3 eFluor 450 (FJK-16a) eBioscience Cat# 48-5773-82; RRID: AB\_1518812  
Anti-mouse IL-4 PE-Cy7 (11B11) eBioscience Cat# 25-7041-82; RRID: AB\_2573520  
Anti-mouse IL-10 APC-Cy7 biolegend Cat# 505036; RRID: AB\_2566331  
Anti-mouse IL-13 PE (eBio13A) eBioscience Cat# 12-7133-82; RRID: AB\_763559  
Anti-mouse IL-13 PE-eFluor610 (eBio13A) eBioscience Cat# 61-7133-82; RRID: AB\_2574654  
Anti-mouse IL-17A APC (eBio17B7) eBioscience Cat# 25-7177-82; RRID: AB\_10732356  
Anti-mouse IFN- $\gamma$  eFluor 450 (XMG1.2) eBioscience Cat# 48-7311-82; RRID: AB\_1834366  
Anti-mouse TNF- $\alpha$  PE-ef610 (MP6-XT22) eBioscience Cat# 61-7321-82; RRID: AB\_2574666  
Anti-mouse-Ki-67 PE-ef610 (SolA15) eBioscience Cat # 61-5698-82; RRID: AB\_2574620  
Anti-mouse CD3 PerCP-Cyanine5.5 eBioscience Cat # 45-0031-82; RRID: AB\_1107000  
Anti-mouse Ly-6G/Ly-6C (RB6-8C5), PerCP-Cyanine5.5 eBioscience Cat #45-5931-80; RRID: AB\_906247  
Anti-mouse CD19 (eBio1D3 (1D3)) PerCP-Cyanine5.5 eBioscience Cat # 45-0193-82; RRID: AB\_1106999  
Anti-mouse B220 (RA3-6B2) PerCP-Cyanine5.5 eBioscience Cat # 45-0452-82; RRID: AB\_1107006  
Anti-mouse CD11c (N418) PerCP-Cyanine5.5 eBioscience Cat # 45-0114-82; RRID: AB\_925727  
Anti-mouse CD11b (M1/70) PerCP-Cyanine5.5 eBioscience Cat # 45-0112-82; RRID: AB\_953558  
Anti-mouse Fc PerCP-Cyanine5.5 biolegend Cat # 149517; RRID: AB\_2632750  
Anti-mouse TCR $\beta$  (H57-597) PerCP-Cyanine5.5 eBioscience Cat # 45-5961-82; RRID: AB\_925763  
Anti-mouse NK1.1 (PK136) PerCP-Cyanine5.5 eBioscience Cat # 45-5941-82; RRID: AB\_914361  
Anti-mouse CD127 (A7R34) Alexa Fluor 700 eBioscience Cat # 56-1271-82; RRID: AB\_657611  
Anti-mouse Ly-6A/E (Sca-1) (D7) FITC eBioscience Cat # 11-5981-82; RRID: AB\_465333  
Anti-mouse ST2 (RMST2-2) PE eBioscience Cat # 12-9335-82; RRID: AB\_2572708  
Anti-mouse ST2 (RMST2-2) Percp-eFluor710 eBioscience Cat # 46-9335-82; RRID: AB\_2573883  
Anti-mouse GATA3 (RMST2-2) Percp-eFluor710 eBioscience Cat # 46-9335-82; RRID: AB\_2573883  
Anti-IL-33 antibody [Nessy-1] abcam Cat #ab54385; RRID: AB\_881109  
P44/42 MAPK(Erk1/2) (L34F12) mouse mAb CST Cat# 4696 ; RRID:AB\_390780  
Phospho- P44/42 MAPK(Erk1/2) (Thr202/Tyr204) (197G2) Rabbit mAb CST Cat# 4377; RRID:AB\_331775  
p38 MAPK (D13E1) XP Rabbit mAb CST Cat #8690; RRID:AB\_10999090  
Phospho-p38 MAPK (Thr180/Tyr182) (28B10) Mouse mAb Cat #9216; RRID:AB\_331296  
Anti-JNK1+JNK2+JNK3 antibody [EPR16797-211] abcam Cat #ab179461; RRID: AB\_2744672  
Phospho-SAPK/JNK (Thr183/Tyr185) (81E11) Rabbit mAb Cat #4668; RRID:AB\_823588  
p65 rabbit mAb (C22B4) CST Cat# 4764; RRID:AB\_823578  
Phospho-p65 (Ser536) rabbit mAb (93H1) CST Cat# 3033; RRID:AB\_331284  
GAPDH rabbit mAb (14C10) CST Cat# 2118; RRID:AB\_561053

### **Chemicals, Peptides, and Recombinant Proteins**

Recombinant human IL-2 R&D Systems Cat# 202-IL-500  
Recombinant human TGF- $\beta$ 1 R&D Systems Cat# 240-B-010  
Recombinant mouse IL-1 $\beta$  PeproTech Cat# 211-11B  
Recombinant mouse IL-4 PeproTech Cat# 214-14  
Recombinant mouse IL-5 PeproTech Cat# 215-15  
Recombinant mouse IL-6 PeproTech Cat# 216-16  
Recombinant mouse IL-7 PeproTech Cat# 217-17  
Recombinant mouse IL-12 PeproTech Cat# 210-12  
Recombinant mouse IL-13 PeproTech Cat# 210-13  
Recombinant mouse IL-15 PeproTech Cat# 210-15  
Recombinant mouse IL-21 R&D Systems Cat# 594-ML-025  
Recombinant mouse IL-22 R&D Systems Cat# 582-ML-010  
Recombinant mouse IL-23 R&D Systems Cat# 1887-ML-010  
Recombinant mouse/rat IL-33 R&D Systems Cat# M3300  
Recombinant mouse TNF- $\alpha$  PeproTech Cat# 315-01A  
Recombinant mouse IFN- $\gamma$  PeproTech Cat# 315-05  
Recombinant Human IL-1 $\beta$  PeproTech Cat# 200-01B  
(5Z)-7-Oxozeaenol R&D Systems Cat# 3604/1  
U0126 R&D Systems Cat# 1144/25  
SB203580 R&D Systems Cat# 1202/10  
SP600125 Invitrogen Cat# tlr-sp60

JSH23 ab144824 abcam Cat#749886-87-1  
PMA Sigma Aldrich Cat# P1585  
Ionomycin Sigma Aldrich Cat# I0634  
Golgi-Plug BD Biosciences Cat# 555029  
TRizol reagent Invitrogen Cat# 15596026  
DNase I Sigma Alcrich Cat# DN25  
Collagenase GIBCO Cat# 17104019

#### **Reagent or Resource source identifier RNeasy**

Mini Kit QIAGEN Cat# 74106  
High-Capacity cDNA Reverse Transcription Kit Applied Biosystems Cat# 4368814  
TaqMan Gene Expression Master Mix Applied Biosystems Cat# 4369016  
Foxp3/Transcription Factor Staining Buffer Set eBioscience Cat# 00-5523-00  
Cytotfix/Cytoperm Fixation/ Permeabilization Solution Kit BD Biosciences Cat# 554714  
CD4<sup>+</sup> T cell isolation kit, mouse Miltenyi Biotec Cat # 130-104-456  
CD4<sup>+</sup>CD25<sup>+</sup> Regulatory T Cell Isolation Kit, mouse Miltenyi Biotec Cat# 130-091-041

#### **Experimental Models: Cell Lines**

hADSC Human Adipose-Derived Stem Cells Catalog #: PT-5006, Lonza Walkersville Inc

#### **Experimental Models: Organisms/Strains**

Mouse: C57BL/6 The Jackson Laboratory Cat#000664  
Mouse: C57BL/6J-Il33<sup>tm1b(EUCOMM)Cln</sup> Washington university at St. Louis  
Mouse: NOD/ShiLtj The Jackson Laboratory Cat#001976

#### **Oligonucleotides TaqMan**

TaqMan Hprt primer, Mm00446968\_m1 Applied Biosystems  
TaqMan IL33 primer Mm00505403\_m1 Applied Biosystems  
TaqMan ST2 primer Mm00516117\_m1 Applied Biosystems  
TaqMan Cebpa, Mm00514283\_s1 Applied Biosystems  
TaqMan Fabp4, Mm00445878\_m1 Applied Biosystems  
TaqMan Ppar, Mm01184322\_m1 Applied Biosystems  
TaqMan Alp, Mm00475834\_m1 Applied Biosystems  
TaqMan Sox9, Mm00448840\_m1 Applied Biosystems  
TaqMan Gapdh, Mm99999915\_g1 Applied Biosystems  
TaqMan Foxp3, Mm00475162\_m1 Applied Biosystems  
TaqMan Human Gapdh Hs02758991\_m1 Applied Biosystems  
TaqMan Human Il33, Hs04931857\_m1 Applied Biosystems

#### **Reagent or Resource source identifier**

Software and Algorithms FlowJo 9 software FlowJo, LLC <https://www.flowjo.com>, RRID:SCR\_008520  
GraphPad Prism 7 software GraphPad Software <https://www.graphpad.com>, RRID:SCR\_002798  
BD LSRFortessa BD Biosciences  
BD FACSAria cell sorter BD Biosciences

### **Supplemental References**

1. Gondo S, Okabe T, Tanaka T, Morinaga H, Nomura M, Takayanagi R, et al. Adipose tissue-derived and bone marrow-derived mesenchymal cells develop into different lineage of steroidogenic cells by forced expression of steroidogenic factor 1. *Endocrinology*. 2008;149(9):4717-25.
2. Kasagi S, Zhang P, Che L, Abbatiello B, Maruyama T, Nakatsukasa H, et al. In vivo-generated antigen-specific regulatory T cells treat autoimmunity without compromising antibacterial immune response. *Science translational medicine*. 2014;6(241):241ra78.
